# Supplementary material for: A Tale of Two Taxes: Implementation of Earmarked Taxes for Behavioral Health Services in California and Washington State
Source: Atypon-hosted journal article supplement (doi:10.1176/appi.ps.20230257), 2023-11-07
Supplement: appi.ps.20230257.ds001.pdf [file appi.ps.20230257.ds001.pdf]

[Type here]

Online supplement for 10.1176/appi.ps.20230257

## Supplemental Tables, Means

### Characteristics of Survey Respondents

|                                                                      | All<br>(N=155) |      | CA<br>(n=87) |      | WA<br>(n=68) |      | F     | p     |
|----------------------------------------------------------------------|----------------|------|--------------|------|--------------|------|-------|-------|
|                                                                      | Mean           | SD   | Mean         | SD   | Mean         | SD   |       |       |
| Collecting/reporting information for compliance                      | 5.25           | 1.91 | 5.82         | 1.48 | 4.35         | 2.18 | 21.56 | <.001 |
| Directly providing tax funded services                               | 4.71           | 2.27 | 4.95         | 2.17 | 4.35         | 2.40 | 2.41  | 0.12  |
| Making decisions services to fund with tax revenue                   | 5.52           | 1.90 | 5.59         | 1.98 | 5.44         | 1.80 | 0.46  | 0.5   |
| Evaluating the impacts of tax funded services                        | 5.40           | 1.66 | 5.59         | 1.55 | 5.16         | 1.78 | 2.13  | 0.15  |
| Establishing relationships with external partners related to the tax | 5.67           | 1.60 | 5.88         | 1.49 | 5.40         | 1.70 | 3.01  | 0.09  |
| Strategically planning how tax revenue can be spent                  | 5.53           | 1.84 | 5.72         | 1.89 | 5.26         | 1.76 | 0.001 | 0.97  |
| Monitoring how tax revenue is spent for compliance                   | 5.34           | 1.83 | 5.65         | 1.78 | 4.85         | 1.83 | 0.27  | 0.60  |

[Type here]

Online supplement for 10.1176/appi.ps.20230257

### Perceptions of the Impacts of the Earmarked Tax

|                                                                                                                          | All<br>(N=155) |      | CA<br>(n=87) |      | WA<br>(n=68) |      | F     | p     |
|--------------------------------------------------------------------------------------------------------------------------|----------------|------|--------------|------|--------------|------|-------|-------|
|                                                                                                                          | Mean           | SD   | Mean         | SD   | Mean         | SD   |       |       |
| The tax increases funding for direct behavioral health/social services                                                   | 6.22           | 1.23 | 6.34         | 1.03 | 6.06         | 1.44 | 2.06  | 0.15  |
| The tax increases funding for improvements to behavioral health/social services systems                                  | 5.95           | 1.39 | 5.99         | 1.32 | 5.90         | 1.47 | 0.17  | 0.68  |
| The tax increases access to direct behavioral health/social services for people with the highest need                    | 5.83           | 1.40 | 5.94         | 1.40 | 5.68         | 1.4  | 1.38  | 0.24  |
| The tax increases flexibility to address complex behavioral health/social service needs                                  | 5.77           | 1.39 | 5.79         | 1.30 | 5.73         | 1.52 | 0.07  | 0.79  |
| The tax increases the number of people served by evidence-based practices                                                | 5.58           | 1.60 | 5.7          | 1.41 | 5.43         | 1.81 | 1.07  | 0.30  |
| The tax increases public awareness about behavioral health issues                                                        | 4.75           | 1.74 | 5.29         | 1.63 | 4.05         | 1.62 | 21.81 | <.001 |
| The tax increases transparency about behavioral health/social services systems                                           | 4.68           | 1.78 | 4.91         | 1.7  | 4.38         | 1.86 | 3.19  | 0.08  |
| The tax decreases stigma about behavioral health issues                                                                  | 4.35           | 1.9  | 4.89         | 1.86 | 3.64         | 1.72 | 18.03 | <.001 |
| The tax increases unjustified public/political scrutiny about behavioral health/social services systems                  | 3.30           | 2.05 | 4.19         | 2.07 | 2.15         | 1.35 | 47.40 | <.001 |
| The tax decreases funding from other sources (e.g., general county/state budgets) for behavioral health/social services* | 2.63           | 1.82 | 2.82         | 1.93 | 2.39         | 1.66 | 2.01  | 0.16  |

[Type here]

Online supplement for 10.1176/appi.ps.20230257

**Perceptions of the Attributes of the Earmarked Tax**

|                                                                                                                                                                 | All<br>(N=155) |      | CA<br>(n=87) |      | WA<br>(n=68) |      | F     | p     |
|-----------------------------------------------------------------------------------------------------------------------------------------------------------------|----------------|------|--------------|------|--------------|------|-------|-------|
|                                                                                                                                                                 | Mean           | SD   | Mean         | SD   | Mean         | SD   |       |       |
| Relative advantage: It is better to have the tax than not                                                                                                       | 6.40           | 1.36 | 6.32         | 1.42 | 6.50         | 1.29 | 0.65  | 0.42  |
| Relative advantage: The tax is better than alternative strategies to increase funding for behavioral health services                                            | 4.87           | 1.59 | 5.21         | 1.47 | 4.43         | 1.64 | 9.39  | 0.003 |
| Compatibility: The tax is flexible enough to allow behavioral health service organizations to meet the unique needs of the communities they serve               | 4.82           | 1.69 | 4.62         | 1.73 | 5.08         | 1.62 | 2.75  | 0.10  |
| Compatibility: The tax is compatible with the financing structures of behavioral health service organizations                                                   | 4.65           | 1.73 | 4.79         | 1.75 | 4.48         | 1.71 | 1.15  | 0.29  |
| Complexity: It is hard to understand what is and is not a permissible use of revenue from the tax                                                               | 2.80           | 1.56 | 3.21         | 1.62 | 2.28         | 1.31 | 14.43 | <.001 |
| Complexity: It is complicated to satisfy reporting requirements related to using revenue from the tax                                                           | 3.93           | 2.13 | 4.94         | 1.86 | 2.56         | 1.67 | 65.63 | <.001 |
| Observability: The impact of the tax on the number of people who receive services is easy to observe                                                            | 4.55           | 1.72 | 4.76         | 1.69 | 4.28         | 1.73 | 2.97  | 0.09  |
| Observability: The impact of the tax on the behavioral health status of communities is easy to observe                                                          | 4.49           | 1.69 | 4.59         | 1.77 | 4.37         | 1.58 | 0.68  | 0.41  |
| Trialability: The tax allows behavioral health service organizations to try new services and assess whether they meet needs before taking the services to scale | 5.20           | 1.54 | 5.54         | 1.38 | 4.74         | 1.64 | 10.67 | 0.001 |
| Trialability: The rules related to how revenue from the tax can be spent can be easily changed to address emergent needs                                        | 2.76           | 1.59 | 2.44         | 1.58 | 3.16         | 1.51 | 8.29  | 0.01  |

[Type here]

Online supplement for 10.1176/appi.ps.20230257

**Perceptions of Support for the Earmarked Tax**

|                                                            | All<br>(N=155) |      | CA<br>(n=87) |      | WA<br>(n=68) |      | F    | p    |
|------------------------------------------------------------|----------------|------|--------------|------|--------------|------|------|------|
|                                                            | Mean           | SD   | Mean         | SD   | Mean         | SD   |      |      |
| Consumers of behavioral health services in my jurisdiction | 5.91           | 1.31 | 6.1          | 1.26 | 5.65         | 1.35 | 3.44 | 0.07 |
| State behavioral health agency officials in my state       | 5.87           | 1.37 | 5.73         | 1.44 | 6.06         | 1.25 | 3.00 | 0.09 |
| Local elected officials in my jurisdiction                 | 5.51           | 1.51 | 5.19         | 1.62 | 5.91         | 1.25 | 7.31 | 0.01 |
| State elected officials in my state                        | 5.23           | 1.56 | 4.85         | 1.69 | 5.74         | 1.20 | 8.28 | 0.01 |
| The general public in my jurisdiction                      | 5.05           | 1.43 | 5.09         | 1.55 | 5.00         | 1.26 | 3.08 | 0.08 |
